# Supplementary material for: Eco-friendly nanoparticles from Fusarium solani suppress biofilms and quorum sensing in Pseudomonas aeruginosa
Source: Royal Society of Chemistry journal article supplement (doi:10.1039/d5na00898k), 2025-11-10
Supplement: d5na00898k1.pdf [file d5na00898k1.pdf]

## Eco-friendly Nanoparticles from *Fusarium solani* Suppress Biofilms and Quorum Sensing in *Pseudomonas aeruginosa*

Karokh Ali Khdir<sup>1</sup> , Sirwan Muhsin Muhammed<sup>2</sup> 

<sup>1</sup>Biology Department, College of Education, University of Sulaimani, Sulaymaniyah,  
Kurdistan Region, 46001, Iraq

<sup>2</sup>Biology Department, College of Science, University of Sulaimani, Sulaymaniyah,  
Kurdistan Region, 46001, Iraq

Corresponding author

Karokh Ali Khdir

<sup>1</sup>karokh.khdir@univsul.edu.iq

<sup>2</sup>sirwan.muhammed@univsul.edu.iq

| Identification tests                                   | Results                                                                                   |
|--------------------------------------------------------|-------------------------------------------------------------------------------------------|
| Gram staining                                          | Gram negative bacilli, singly or in pairs                                                 |
| Cetrimide agar                                         | The colonies were round, convex and mucoid with blue-green and yellow-green pigmentations |
| MacConkey agar                                         | Colonies were flat, smooth and non- lactose fermenter with a little pigmentation          |
| Catalase                                               | Positive                                                                                  |
| Oxidase                                                | Positive                                                                                  |
| Highly automatic BD Phoenix™ M50 identification system | Showed <i>P. aeruginosa</i>                                                               |

Table S1. List of phenotypic characteristics used in identification of *P.aeruginosa*

| Samples | Annealing (°C) | D (nm)       | $\delta$ (nm <sup>-2</sup> ) | $\epsilon$     | d-spacing (Å) | $\rho_x$ (g/cm <sup>3</sup> ) | SSA (m <sup>2</sup> /g) | Porosity (%) |
|---------|----------------|--------------|------------------------------|----------------|---------------|-------------------------------|-------------------------|--------------|
| AgNPs   | 80             | 18.49        | 0.00293                      | 0.00574        | 2.356         | 10.53                         | 30.82                   | 97.15        |
|         | 150            | 22.34        | 0.00200                      | 0.00475        | 2.358         | 10.51                         | 25.56                   | 97.03        |
|         | <b>200</b>     | <b>18.29</b> | <b>0.00299</b>               | <b>0.00580</b> | <b>2.358</b>  | <b>10.52</b>                  | <b>31.19</b>            | <b>97.05</b> |
|         | 250            | 20.07        | 0.00248                      | 0.00528        | 2.356         | 10.53                         | 28.40                   | 97.04        |
| CuNPs   | 80             | 29.23        | 0.00117                      | 0.00322        | 2.089         | 8.91                          | 23.03                   | 96.19        |
|         | <b>150</b>     | <b>26.68</b> | <b>0.00141</b>               | <b>0.00352</b> | <b>2.085</b>  | <b>8.96</b>                   | <b>25.11</b>            | <b>96.65</b> |
|         | 200            | 27.18        | 0.00135                      | 0.00345        | 2.086         | 8.95                          | 24.67                   | 96.42        |

|  |     |       |         |         |       |      |       |       |
|--|-----|-------|---------|---------|-------|------|-------|-------|
|  | 250 | 28.33 | 0.00125 | 0.00331 | 2.086 | 8.95 | 23.65 | 96.31 |
|--|-----|-------|---------|---------|-------|------|-------|-------|

Table S2. Crystallite size (D), dislocation ( $\delta$ ), strain ( $\epsilon$ ), d-spacing ( $\text{\AA}$ ), X-ray density ( $\rho_x$ ), specific surface area (SSA), and porosity percentage of AgNPs and CuNPs annealed at different annealing temperatures.

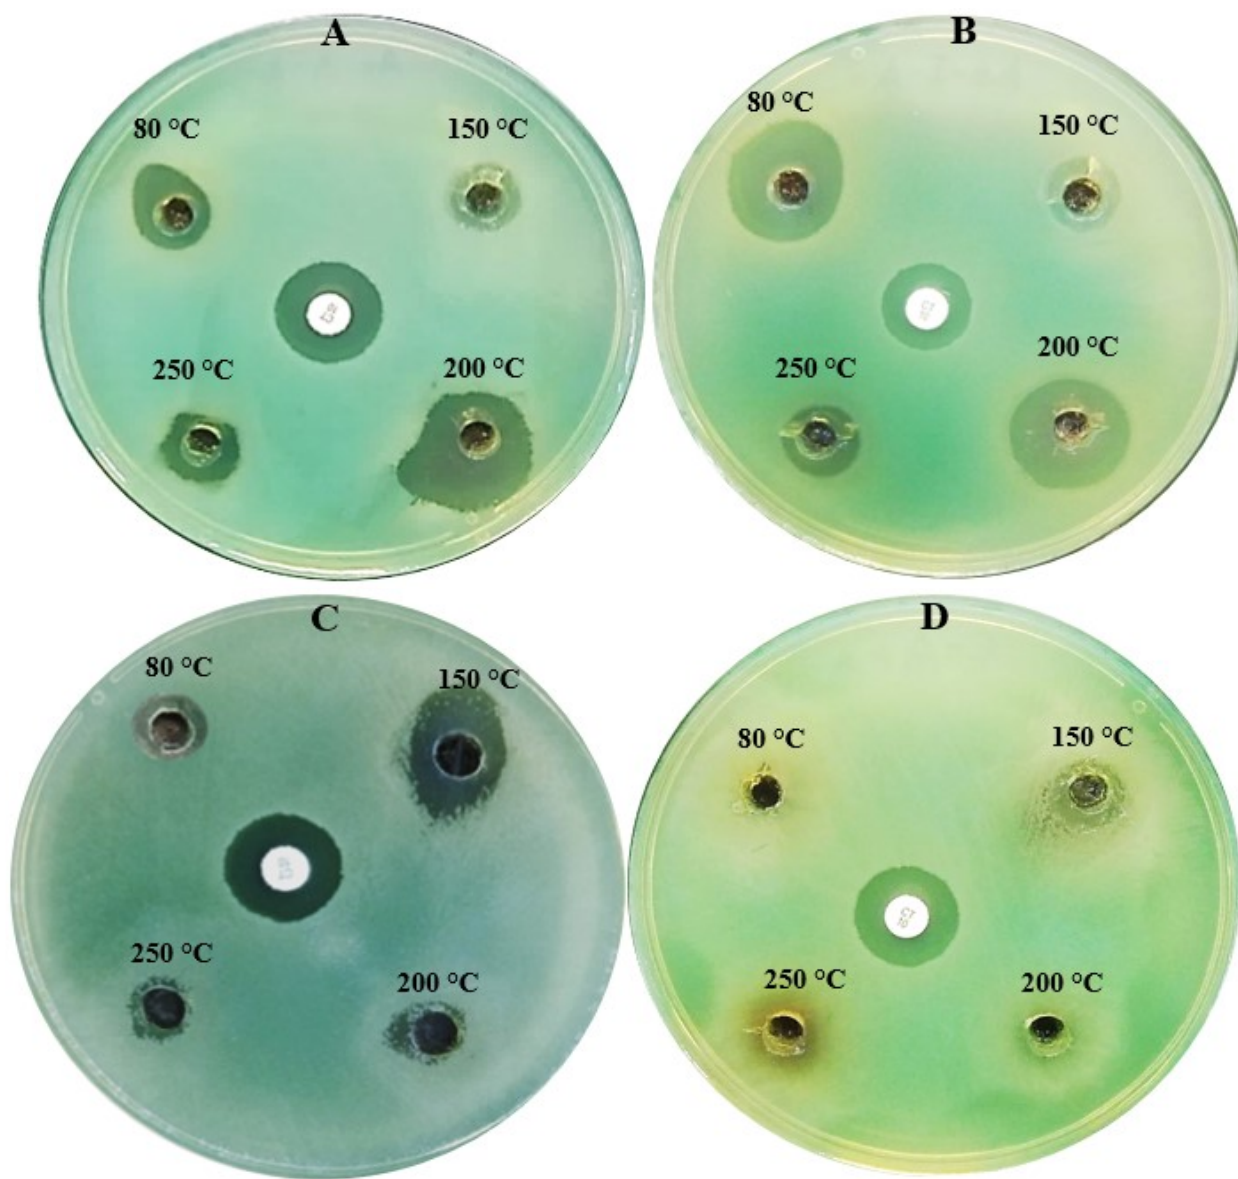

Figure S1. Antibacterial activity of AgNPs and CuNPs at different annealing temperatures of 80, 150, 200, and 250 °C using well diffusion agar method. A (AgNPs against ATCC), B (AgNPs against isolate), C (CuNPs against ATCC), and D (CuNPs against isolate). Positive control is colistin (10  $\mu\text{g}$ /disc).
